# Supplementary material
Source: PubMed Central journal article supplement (PMC1299310)
Supplement: 6-7400404s1.pdf [file 6-7400404s1.pdf]

```

1  M L K K K K D Y E N A D L E D C N T K - - - - - E I K G Y S K V G S E K N I - - - - pfmap-
1  M L K K K K E Y S G I E K E E K N T K K K N N A S E C L S M Q N D D S T Y I D S N E E D K S W E Y I pbmap-

34  - K K K M T S I K E S S S R D E E E E D A N V N K N I K K F K E G N K K D N I S K N C N I V E K K N pfmap-
51  N E N T N E N I K N N D D I N K K S G E K E Y N A S E T K K T N N N E K N K N N S N N K T S K I N D pbmap-

83  N K S K E E K I N I K E A I I K N V K V P D N Y E I K H L I G R G S Y G Y V Y L A Y D K N A N K N V pfmap-
101 E K - - - - I N I K E A I I K N V H V P D N Y I I K H L I G R G S Y G Y V Y L A Y D K N T E K N V pbmap-

133 A I K K V N R M F E D L I D C K R I L R E I T I L N R L K S D Y I I R L H D L I I P E D L L K F D E pfmap-
146 A I K K V N R M F E D L I D C K R I L R E I T I L N R L K S D Y I I R L Y D L I I P D D L L K F D E pbmap-

183 I Y I V L E I A D S D L K K L F K T P I F L T E Q H V K T I L Y N L L L G E K F I H E S G I I H R D pfmap-
196 I Y I V L E I A D S D L K K L F K T P I F L T E E H I K T I L Y N L L L G E N F I H E S G I I H R D pbmap-

233 L K P A N C L L N Q D C S V K I C D F G L A R T I N S D K D I H I V N D L E E K E E N E E P G P H N pfmap-
246 L K P A N C L L N Q D C S V K V C D F G L A R T I N S E K D T N I V N D L E - - - E N E E P G P H N pbmap-

283 K N L K K Q L T S H V V V T R W Y R A P E L I L L Q E N Y T N S I D I W S T G C I F A E L L N M M K S pfmap-
293 K N L K K Q L T S H V V V T R W Y R A P E L I L L Q E N Y T K S I D I W S T G C I F A E L L N M L Q S pbmap-

333 H I N N P T N R F P L F P G S S C F P L S P D H N S K K V H E K S N R D Q L N I I F N V I G T P P E pfmap-
343 H I N D P T N R F P L F P G S S C F P L S P D R N S K K V H E K S N R D Q L N I I F N I I G T P T E pbmap-

383 E D L K C I T K Q E V I K Y I K L F P T R D G I D L S K K Y S S I S K E G I D L L E S M L R F N A Q pfmap-
393 D D L K N I N K P E V I K Y I K L F P H R K P I N L K Q K Y P S I S D D G I N L L E S M L K F N P N pbmap-

433 K R I T I D K A L S H P Y L K D V R K E N L E N F S T E K I I L P F D D W M V L S E T Q L R Y I F L pfmap-
443 K R I T I D Q A L D H P Y L K D V R K K K L E N F S T K K I I L P F D D W M V L S E T Q L R Y I F L pbmap-

483 K E I Q S F H A D L I I P A K L N I H Q K S F Y N M . pfmap-
493 K E V Q S F H P E L V I P S V F T I H E N N F Y N N E K P S S . pbmap-

```

**Fig. 1-SI.** Alignment of Pbmap-2 (PlasmoDB identifier Pb\_5294-2-125-1861) with Pfmmap-2 (PF11\_0147). Boxed areas indicate identical amino acid residues. Boxes highlight the ATP binding glycine triad IGRGSYGYV, the catalytic site HRDLKPANCLL and the atypical activation site TSH, all of which are identical in both sequences. The arrows indicate the boundaries of the fragment used to generate the knock-out construct.

**Table 1-SI: Gametocyte numbers in wild-type parasites and Pbmap-2 knock-out mutants.**

| Genotype       | Number of asexuals/10000 RBCs at 24 hpi | Number of gametocytes/10000 RBCs at 30 hpi | Conversion rate | Female: male ratio |
|----------------|-----------------------------------------|--------------------------------------------|-----------------|--------------------|
| NK65<br>n=2    | 311.1 ± 14.2                            | 12.3 ± 3.3                                 | 3.9%            | 2.0                |
| a1 (WT)<br>n=2 | 380.9 ± 13.6                            | 32.7 ± 7.6                                 | 8.6 %           | 1.1                |
| b1 (KO)<br>n=2 | 393.3 ± 98.5                            | 20.3 ± 9.1                                 | 5.2%            | 1.4                |
| c2 (KO)<br>n=2 | 241.7 ± 36.5                            | 23.1 ± 6.9                                 | 9.6%            | 1.7                |

**Table 2-SI: Transmissibility to mosquitoes of wild-type parasites and Pbmap-2 knock-out mutants.** See Methods for details.

| Genotype       | Number of oocysts          | Percentage infectivity | Number of sporozoites/mosquito |
|----------------|----------------------------|------------------------|--------------------------------|
| NK65<br>n=3    | 42.6 ± 37.39<br>range 0-92 | 73.3%                  | 5666<br>(range 2000-10,000)    |
| a1 (WT)<br>n=2 | 32.8 ± 28.2<br>range 8-100 | 100%                   | 6000<br>(range 6000)           |
| b1 (KO)<br>n=3 | 0                          | 0                      | 16<br>(range 0-50)             |
| c2 (KO)<br>n=3 | 0                          | 0                      | 0                              |

**Table 3-SI: List of primers used in this study.**

| Name of primer | Sequence                            |
|----------------|-------------------------------------|
| Primer 1       | GCGTTTTCCCATACGATCATA               |
| Primer 2       | TAGCTATATAGGATAGTATAAAAGGCAC        |
| Primer 3       | CGCGGATCCTTGAAAAAAAAAAAAAGAATACTCTG |
| Primer 4       | GGCCCTGGTTCTTCATTTTCTTC             |
| Primer 5       | ATGGCACCAAAGCAAAAATAGTAC            |
| Primer 6       | GTACCAGCGAAAATATCTTTGTGTC           |
| Primer 7       | ATGGAAGAAGTGCATTAGTGC               |
| Primer 8       | GAGAAAAGCATAATATGCGGAACC            |
